# Supplementary material
Source: MDPI journal article supplement (https://www.mdpi.com/2073-4441/9/4/241)
Supplement: s1 [file s1]

# Supplementary Materials: Multilevel Drought Hazard Assessment under Climate Change Scenarios in Semi-Arid Regions—A Case Study of the Karkheh River Basin in Iran

Bahareh Kamali <sup>1,2,\*</sup>, Delaram Houshmand Kouchi <sup>1,3</sup>, Hong Yang <sup>1,4</sup> and Karim C. Abbaspour <sup>1</sup>

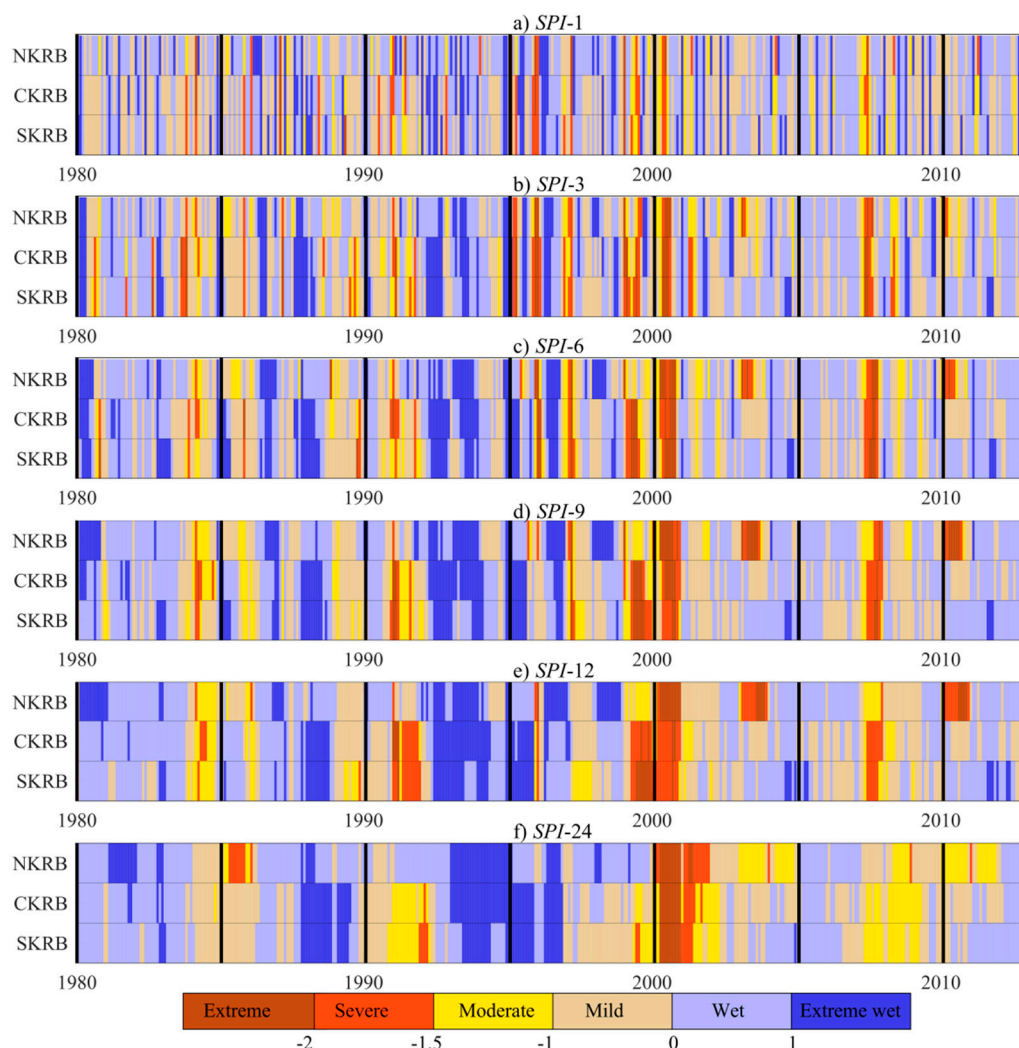

**Figure S1.** Evolution of *SPI* over different time scales in three catchments of KRB

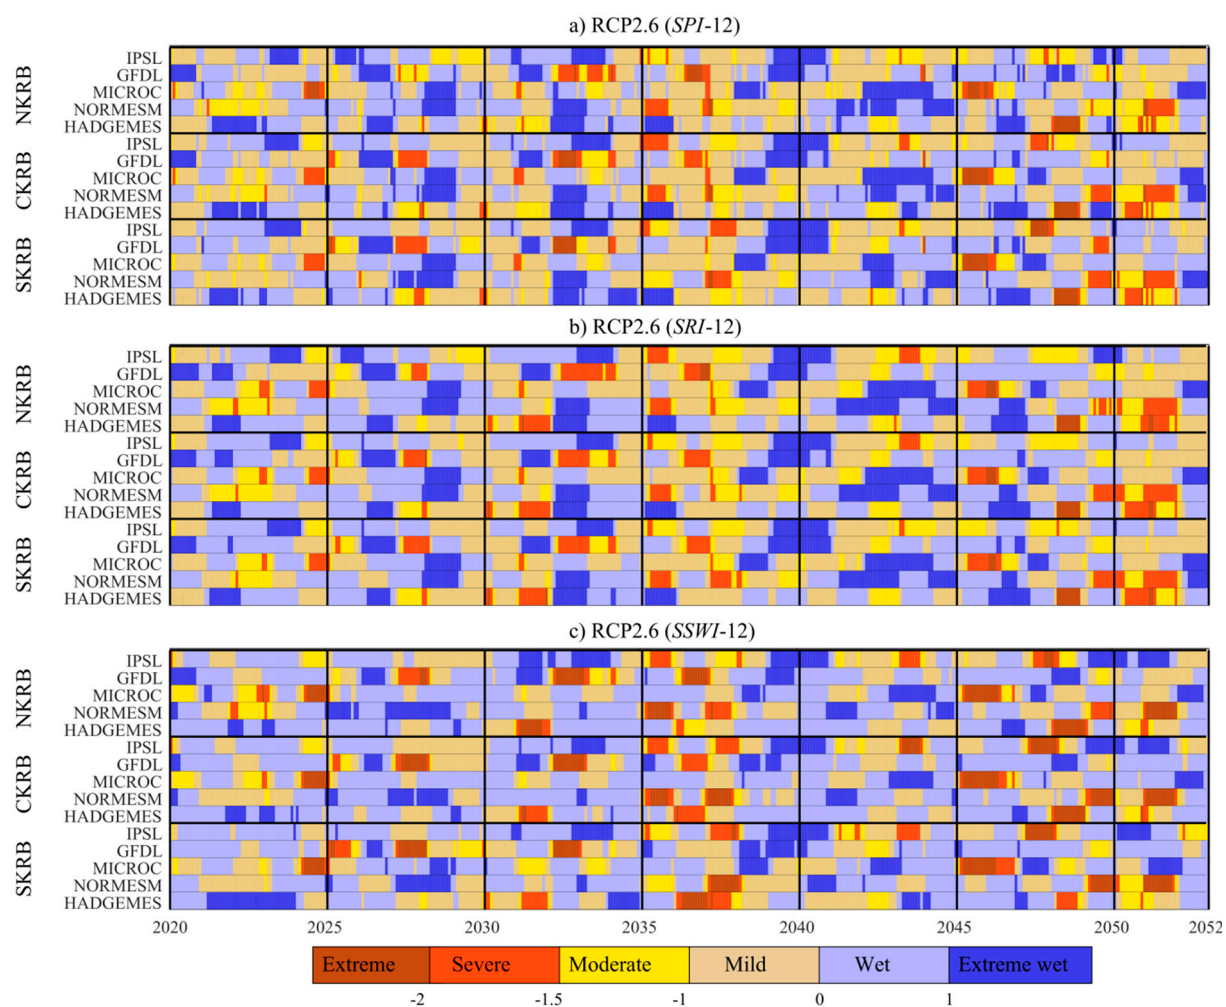

**Figure S2.** The future heat map of (a) meteorological, (b) hydrological, and (c) agricultural droughts in RCP2.6 scenario in three catchments of KRB

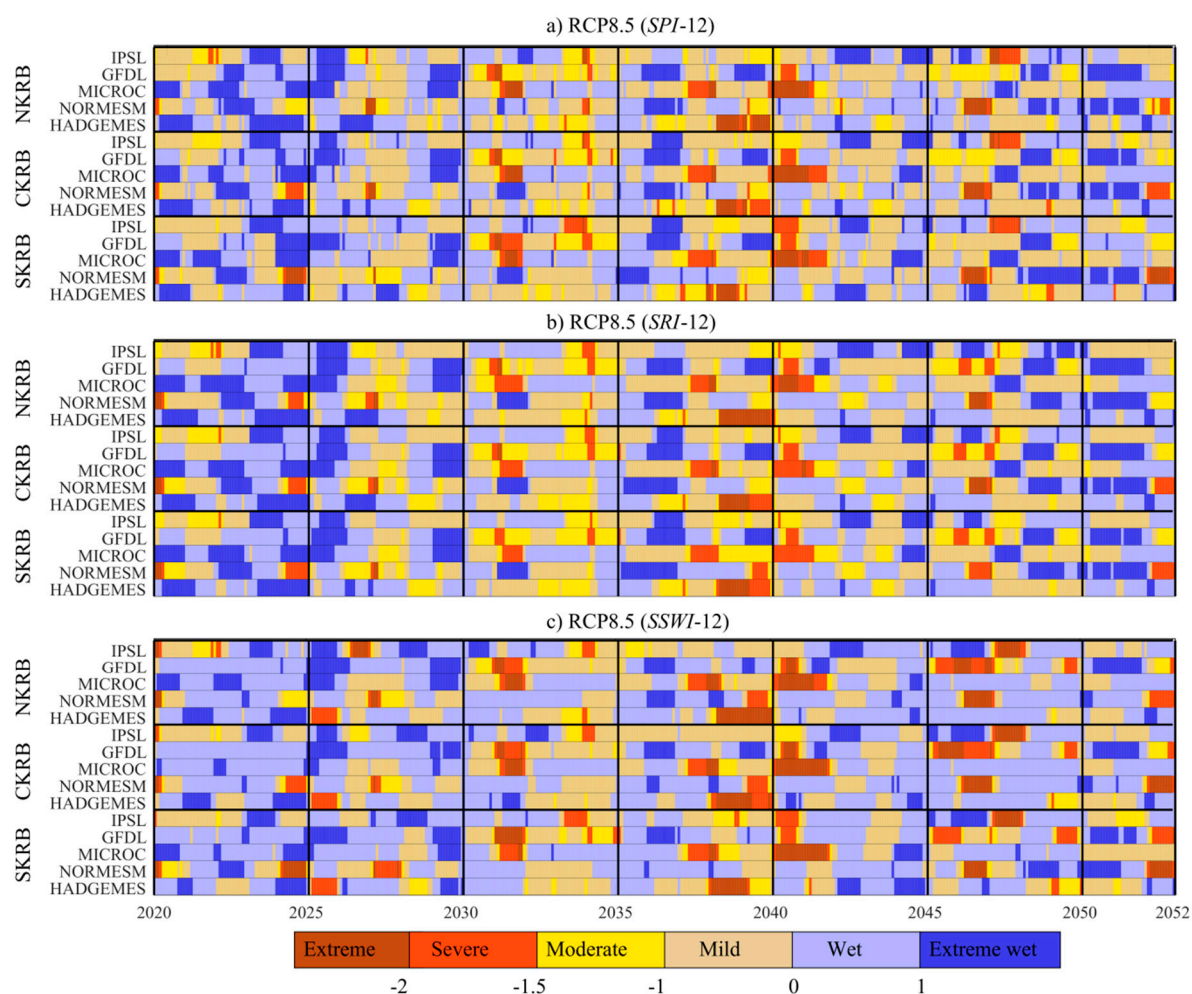

**Figure S3.** The future heat map of (a) meteorological, (b) hydrological, and (c) agricultural droughts in RCP8.5 scenario in three catchments of KRB
